# Supplementary material for: Experimental study of the influence of infrared radiation heating on the adsorption of methane by coal seams
Source: Research Square preprint supplement (doi:10.21203/rs.3.rs-3872534/v1), 2024-01-23
Supplement: Supplementary file 1 [file 36962c1058f0d9a25f315203.docx]

Table 1 Original Data of Liaoning Tiefa Method Coal Sample Adsorption Experiment

| 0W | | 10W | | 15W | | 20W | | 25W | |
| --- | --- | --- | --- | --- | --- | --- | --- | --- | --- |
| Equilibrium pressure | Adsorption capacity | Equilibrium pressure | Adsorption capacity | Equilibrium pressure | Adsorption capacity | Equilibrium pressure | Adsorption capacity | Equilibrium pressure | Adsorption capacity |
| 0.501 | 6.010 | 0.466 | 4.368 | 0.472 | 3.212 | 0.44 | 2.127 | 0.423 | 2.169 |
| 0.951 | 8.921 | 0.922 | 6.524 | 1.122 | 5.517 | 0.843 | 3.272 | 0.878 | 2.913 |
| 1.412 | 10.532 | 1.404 | 8.573 | 1.641 | 6.804 | 1.397 | 4.621 | 1.521 | 4.014 |
| 1.714 | 11.288 | 1.699 | 9.889 | 2.024 | 7.563 | 1.953 | 5.266 | 1.869 | 4.271 |
| 2.025 | 12.201 | 1.978 | 10.806 | 2.409 | 7.869 | 2.391 | 5.413 | 2.282 | 4.392 |
| 2.312 | 13.115 | 2.296 | 11.165 | 2.711 | 7.954 | 2.768 | 5.509 | 2.717 | 4.443 |
| 3.161 | 13.789 | 2.901 | 11.612 | 3.521 | 8.211 | 3.398 | 5.819 | 3.503 | 4.609 |
| 4.511 | 14.001 | 4.310 | 11.921 | 4.196 | 8.407 | 4.488 | 6.107 | 4.620 | 4.708 |
| 5.507 | 14.421 | 5.087 | 12.213 | 5.294 | 8.506 | 5.510 | 6.296 | 5.410 | 4.789 |
| 6.609 | 14.710 | 6.121 | 12.301 | 6.089 | 8.552 | 6.409 | 6.452 | 6.711 | 4.851 |
| 7.698 | 15.115 | 7.199 | 12.501 | 7.501 | 8.611 | 7.303 | 6.651 | 7.521 | 4.891 |
| 8.194 | 15.207 | 8.085 | 12.603 | 8.201 | 8.701 | 8.202 | 6.814 | 8.103 | 4.922 |

Table 2 Original Data of Jilin Huaxing Method Coal Sample Adsorption Experiment

| 0W | | 10W | | 15W | | 20W | | 25W | |
| --- | --- | --- | --- | --- | --- | --- | --- | --- | --- |
| Equilibrium pressure | Adsorption capacity | Equilibrium pressure | Adsorption capacity | Equilibrium pressure | Adsorption capacity | Equilibrium pressure | Adsorption capacity | Equilibrium pressure | Adsorption capacity |
| 0.502 | 6.121 | 0.466 | 4.721 | 0.472 | 3.502 | 0.441 | 2.497 | 0.423 | 1.502 |
| 1.019 | 9.201 | 0.922 | 7.011 | 1.122 | 6.201 | 0.843 | 3.701 | 0.878 | 2.811 |
| 1.412 | 11.101 | 1.404 | 9.496 | 1.641 | 6.896 | 1.397 | 4.902 | 1.521 | 3.810 |
| 1.710 | 12.510 | 1.699 | 10.501 | 2.024 | 7.800 | 1.953 | 5.288 | 1.869 | 3.851 |
| 2.101 | 13.201 | 1.978 | 11.821 | 2.409 | 8.621 | 2.391 | 5.467 | 2.282 | 4.202 |
| 2.502 | 13.600 | 2.296 | 12.13 | 2.711 | 8.901 | 2.768 | 5.549 | 2.717 | 4.314 |
| 3.987 | 13.789 | 2.901 | 12.601 | 3.503 | 9.198 | 3.410 | 5.802 | 3.511 | 4.621 |
| 4.489 | 14.111 | 4.111 | 12.897 | 4.202 | 9.411 | 4.521 | 6.101 | 4.607 | 4.706 |
| 5.503 | 14.402 | 5.106 | 13.211 | 5.311 | 9.505 | 5.509 | 6.311 | 5.405 | 4.807 |
| 6.611 | 14.712 | 6.009 | 13.310 | 6.120 | 9.554 | 6.431 | 6.452 | 6.731 | 4.852 |
| 7.710 | 15.012 | 7.210 | 13.501 | 7.513 | 9.604 | 7.310 | 6.653 | 7.521 | 4.890 |
| 8.202 | 15.203 | 8.101 | 13.613 | 8.231 | 9.703 | 8.201 | 6.808 | 8.101 | 4.921 |
